# Supplementary material
Source: PubMed Central journal article supplement (PMC2880718)

## Supporting Information

# Ammonificins A and B, Hydroxyethylamine chroman derivatives from a Cultured Marine Hydrothermal Vent Bacterium, *Thermovibrio ammonificans*.

Eric H. Andrianasolo,<sup>†</sup> Liti Haramaty,<sup>†</sup> Richard Rosario-Passapera,<sup>†</sup> Kelly Bidle,<sup>‡</sup>  
Eileen White,<sup>§,⊥,∇</sup> Costantino Vetriani,<sup>†</sup> Paul Falkowski<sup>†</sup> and Richard Lutz<sup>†,\*</sup>

*Center for Marine Biotechnology, Institute of Marine and Coastal Sciences, Rutgers, The  
State University of New Jersey NJ 08901-8521*

*Department of Biology, Rider University, 2083 Lawrenceville Rd, Lawrenceville, New Jersey 08648*

*Center for Advanced Biotechnology and Medicine, Department of Molecular Biology and Biochemistry,  
Rutgers, The State University of New Jersey, 679 Hoes Lane, Piscataway, New Jersey 08854*

*University of Medicine and Dentistry of New Jersey, Robert Wood Johnson Medical School,  
675 Hoes Lane, Piscataway, New Jersey 08854*

*The Cancer Institute of New Jersey, 195 Little Albany Street, New Brunswick, New Jersey 08903*

\*To whom correspondence should be addressed. Tel.: (732) 932-8959 ext. 242

Fax : (732) 932-6557 E-mail: rlutz@imcs.marine.rutgers.edu

<sup>†</sup> IMCS, Rutgers, The State University of New Jersey.

<sup>‡</sup> Department of Biology, Rider University

<sup>§</sup> CABM, Rutgers, The State University of New Jersey.

<sup>⊥</sup> University of Medicine and Dentistry of New Jersey.

<sup>∇</sup> The Cancer Institute of New Jersey.

### **Spectral Data for Ammonificin A (1) in DMSO-*d*<sub>6</sub>**

**Figure S1** 400 MHz <sup>1</sup>H NMR spectrum of Ammonificin A (1) in DMSO-*d*<sub>6</sub>

**Figure S2** 400 MHz <sup>1</sup>H-<sup>1</sup>H COSY spectrum of Ammonificin A (1) in DMSO-*d*<sub>6</sub>

**Figure S3** 400 MHz <sup>1</sup>H-<sup>1</sup>H COSY spectrum of Ammonificin A (1) in DMSO-*d*<sub>6</sub>  
(partial view of the aromatic ring region)

**Figure S4** 400 MHz <sup>1</sup>H-<sup>1</sup>H COSY spectrum of Ammonificin A (1) in DMSO-*d*<sub>6</sub> (partial view  
of the dihydropyran moiety and hydroxyethylamine moiety)

**Figure S5** 500 MHz HSQC spectrum of Ammonificin A (1) in DMSO-*d*<sub>6</sub> (partial  
view of the aromatic ring region)

- Figure S6** 400 MHz HMBC spectrum (optimized for  $J = 8\text{Hz}$  ) of Ammonificin A (1) in DMSO- $d_6$  (partial view of the aromatic ring region)
- Figure S7** 400 MHz HMBC spectrum (optimized for  $J = 8\text{Hz}$  ) of Ammonificin A (1) in DMSO- $d_6$  (partial view of the dihydropyran moiety and hydroxyethylamine moiety)
- Figure S8** LR-ESI spectrum of Ammonificin A (1)
- Figure S9** 500 MHz  $^1\text{H}$  NMR spectrum of Ammonificin B (2) in DMSO- $d_6$
- Figure S10** LR-ESI spectrum of Ammonificin B (2)
- Figure S11** HPLC trace Ammonificin A (1)
- Figure S12** HPLC trace Ammonificin B (2)
- Figure S13** Experimental and calculated CD spectra of Ammonificin A (1)
- Figure S14** Experimental and calculated CD spectra of Ammonificin A (1) 3*R*, 4*S*, 9*R* and Ammonificin A (2) 3*R*, 4*R*, 9*S*
- Figure S15** Phylogenetic position of *T. ammonificans* (strain HB-1<sup>T</sup>).

**Figure S1** 400 MHz  $^1\text{H}$  NMR spectrum of Ammonificin A (**1**) in  $\text{DMSO-}d_6$

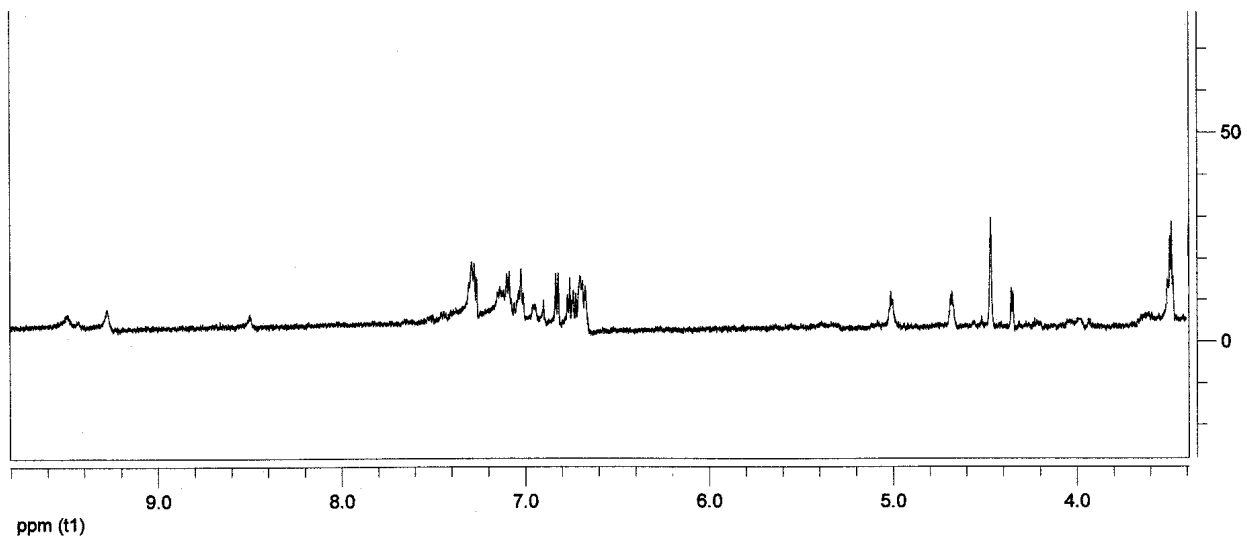

**Figure S2** 400 MHz  $^1\text{H}$ - $^1\text{H}$  COSY spectrum of Ammonificin A (**1**) in  $\text{DMSO-}d_6$

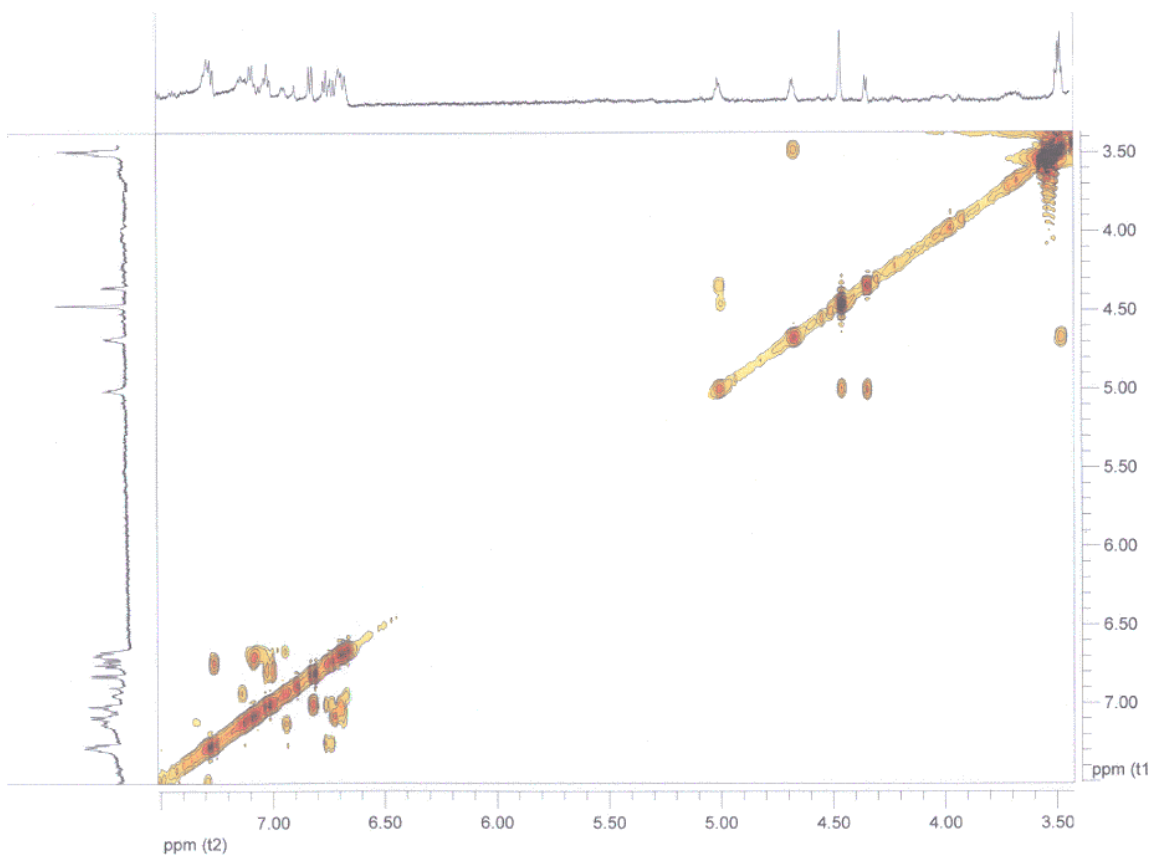

**Figure S3** 400 MHz  $^1\text{H}$ - $^1\text{H}$  COSY spectrum of Ammonificin A (**1**) in  $\text{DMSO-}d_6$  (partial view of the aromatic ring region)

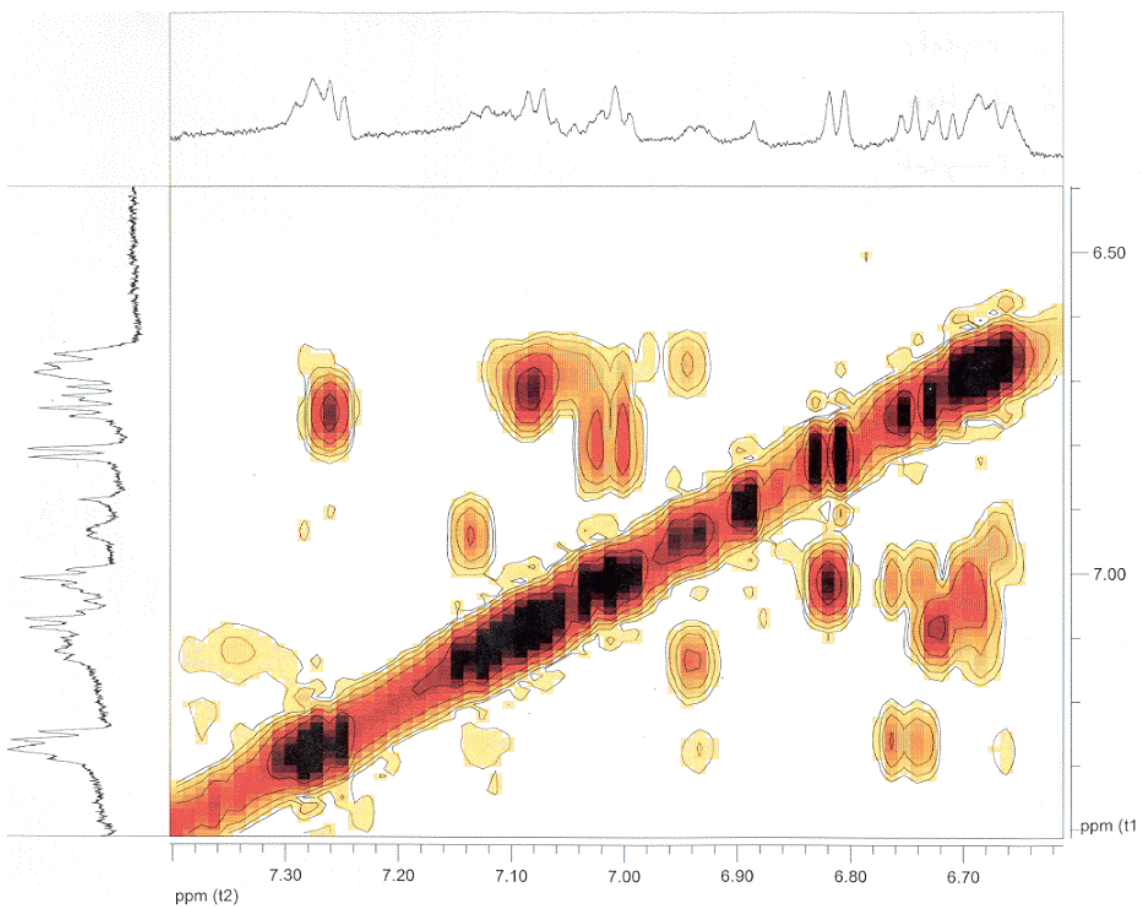

**Figure S4** 400 MHz  $^1\text{H}$ - $^1\text{H}$  COSY spectrum of Ammonificin A (**1**) in  $\text{DMSO-}d_6$  (partial view of the dihydropyran moiety and hydroxyethylamine moiety)

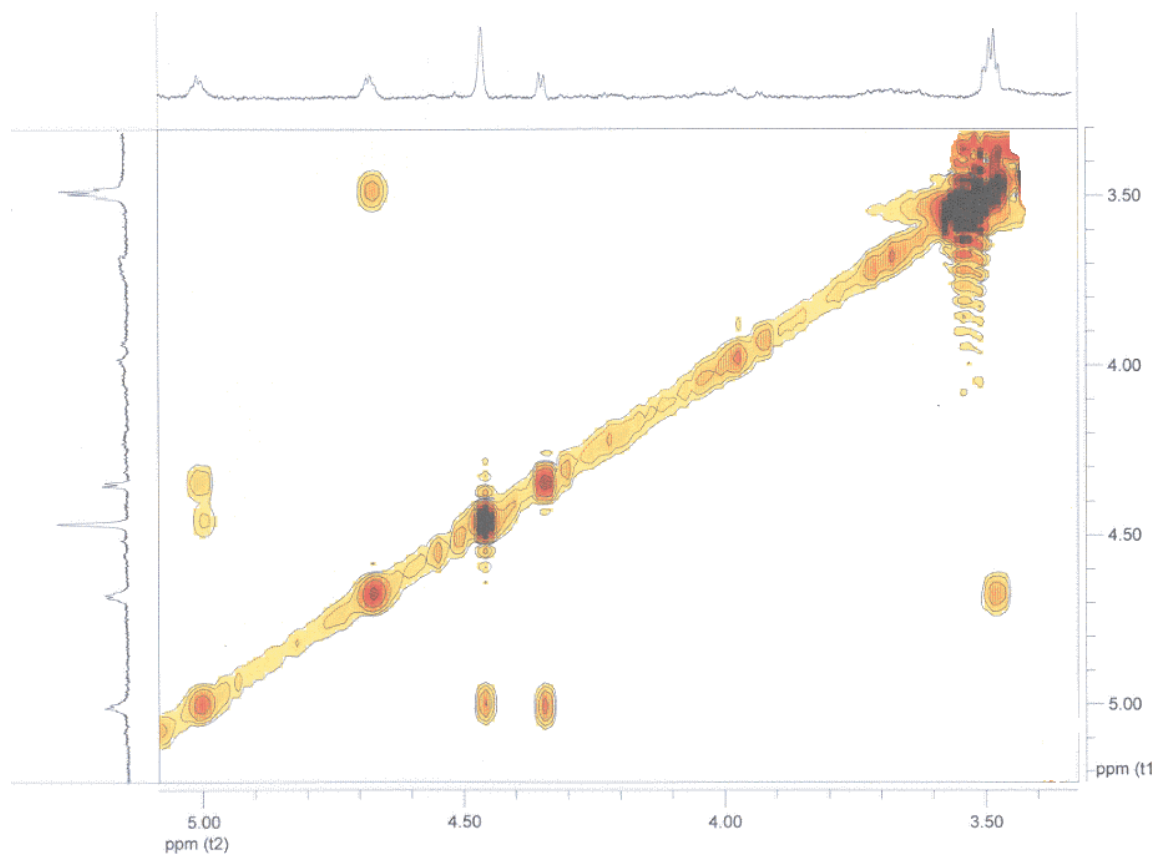

**Figure S5** 500 MHz HSQC spectrum of Ammonificin A (**1**) in DMSO- $d_6$  (partial view of the aromatic ring region)

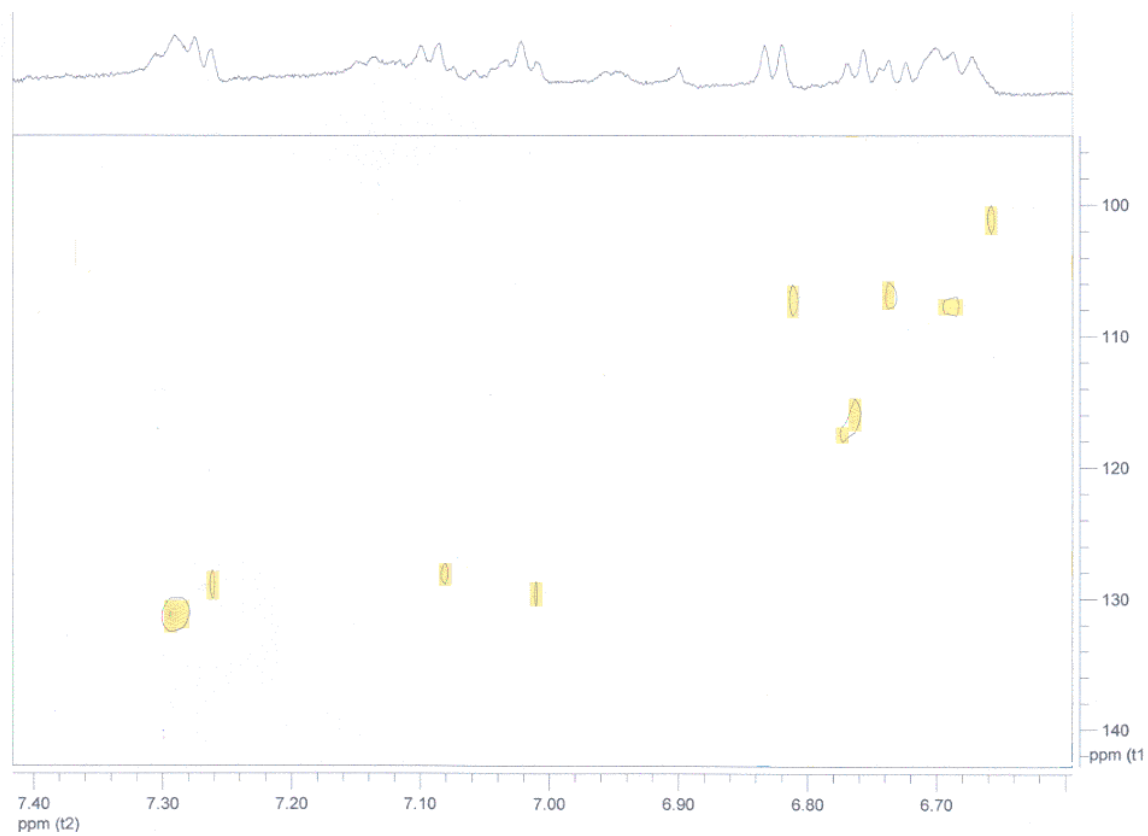

**Figure S6** 400 MHz HMBC spectrum (optimized for  $J = 8\text{Hz}$ ) of Ammonificin A (1) in  $\text{DMSO-}d_6$  (partial view of the aromatic ring region)

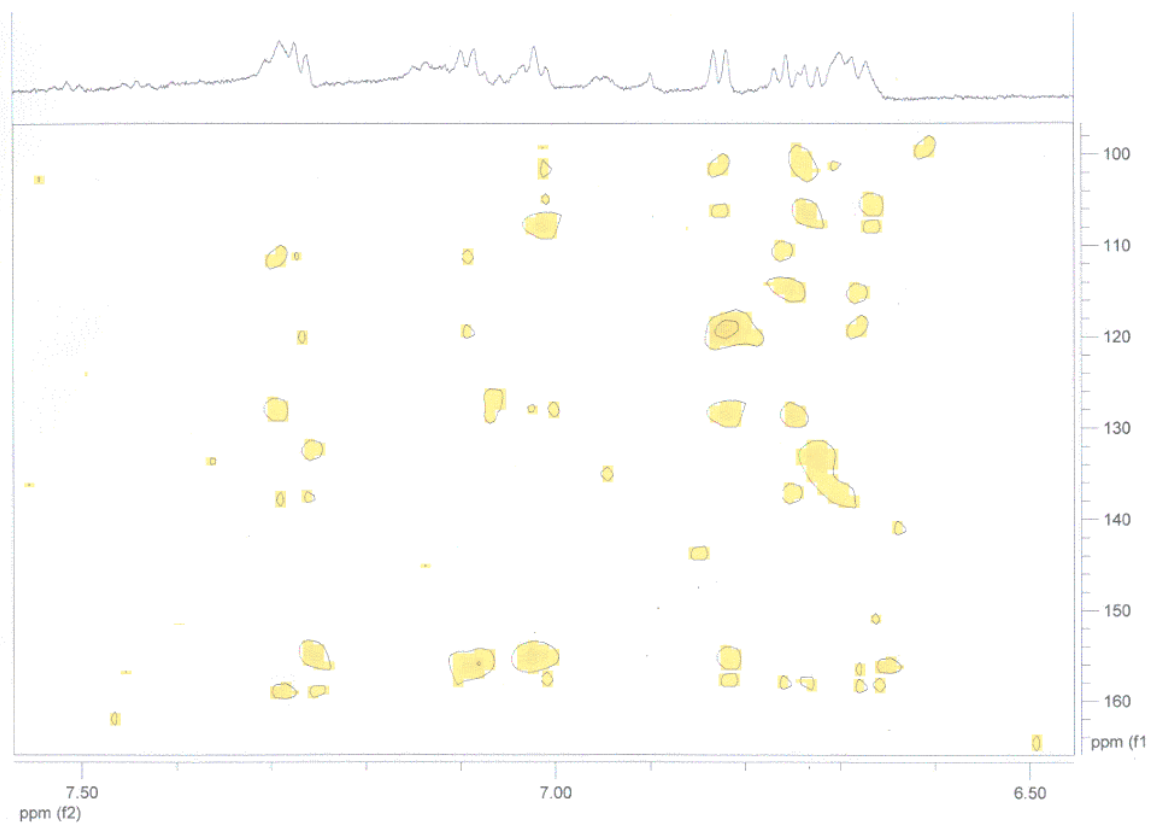



**Figure S7** 400 MHz HMBC spectrum (optimized for  $J = 8\text{Hz}$ ) of Ammonificin A (**1**) in  $\text{DMSO-}d_6$  (partial view of the dihydropyran moiety and hydroxyethylamine moiety)

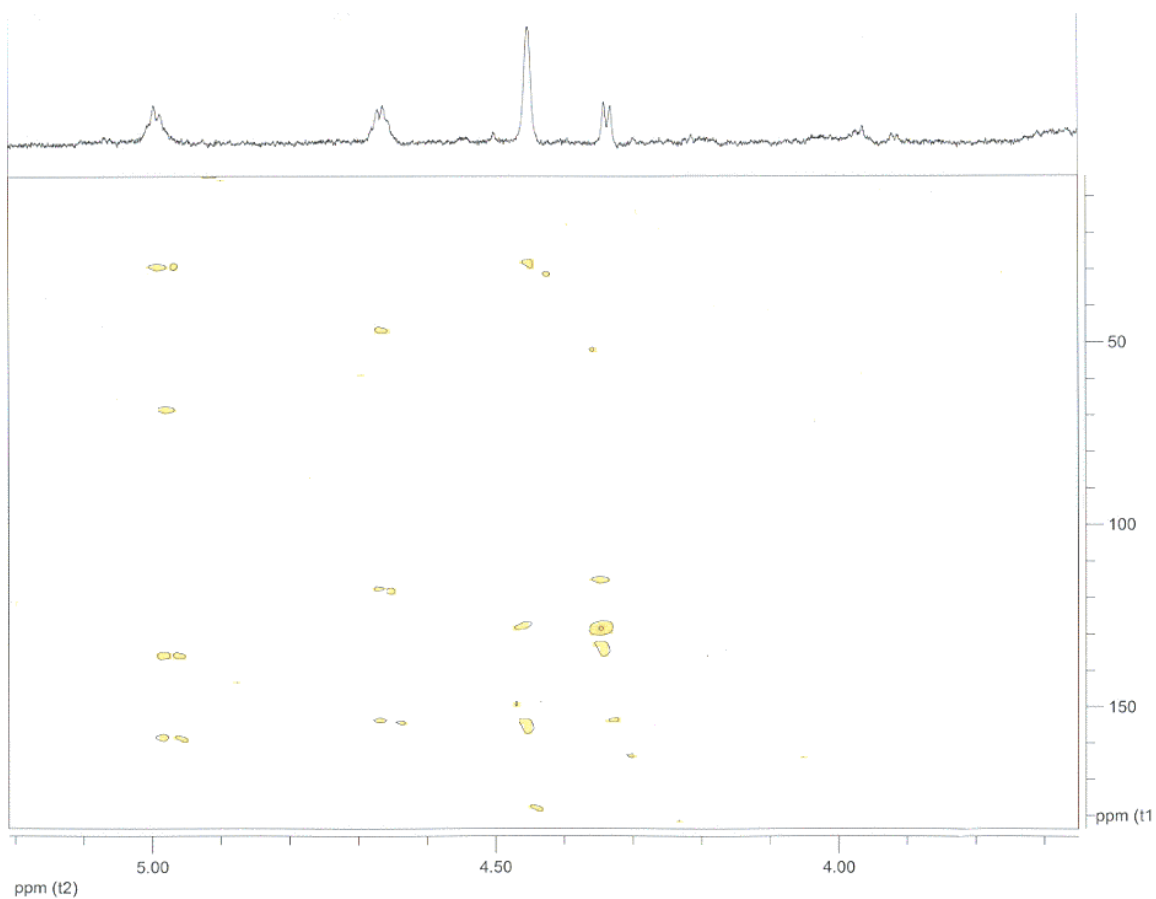

**Figure S8** LR-ESI spectrum of Ammonificin A (1)

P1-ACN-positive\_080403120024 #321 RT: 1.01 AV: 1 NL: 2.43E4  
T: ПMS + c ESI Full ms [150.00-2000.00]

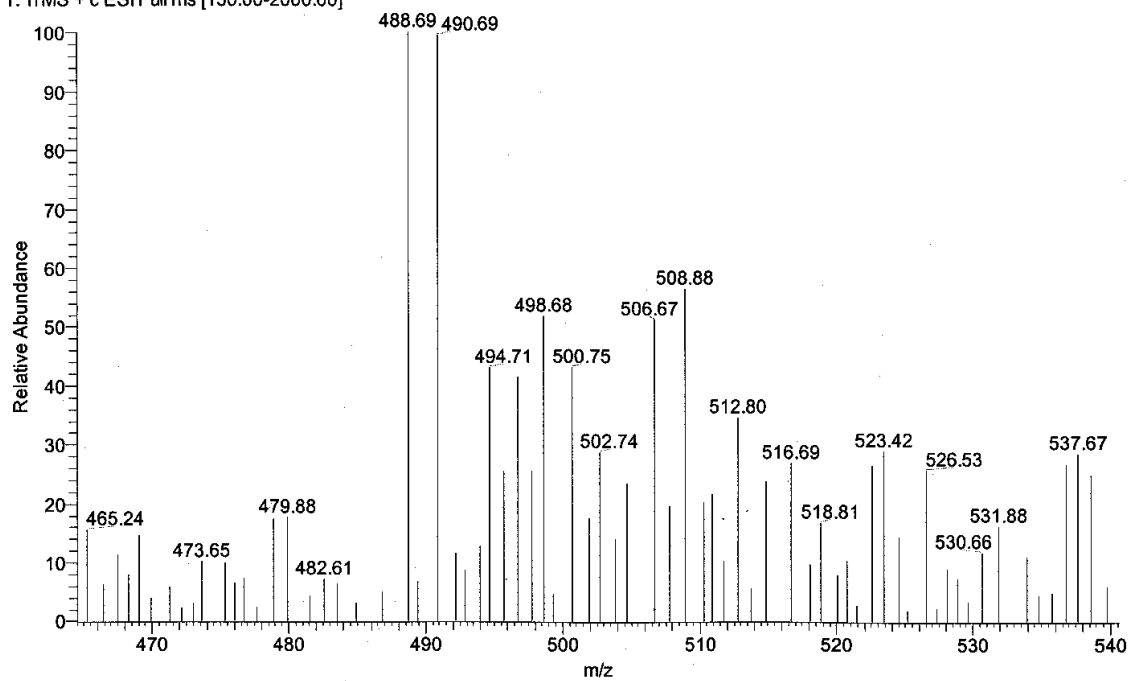

**Figure S9** 500 MHz  $^1\text{H}$  NMR spectrum of Ammonificin B (**2**) in  $\text{DMSO-}d_6$

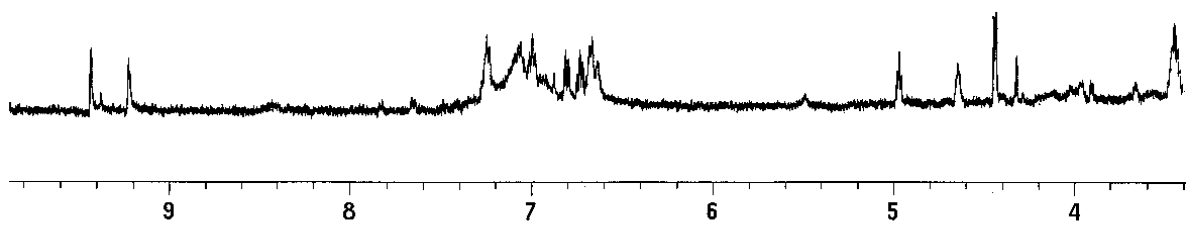

**Figure S10** LR-ESI spectrum of Ammonificin B (2)

P1-ACN-positive\_080403120024 #321 RT: 1.01 .AV: 1 NL: 4.45E4  
T: ITMS + c ESI Full ms [150.00-2000.00]

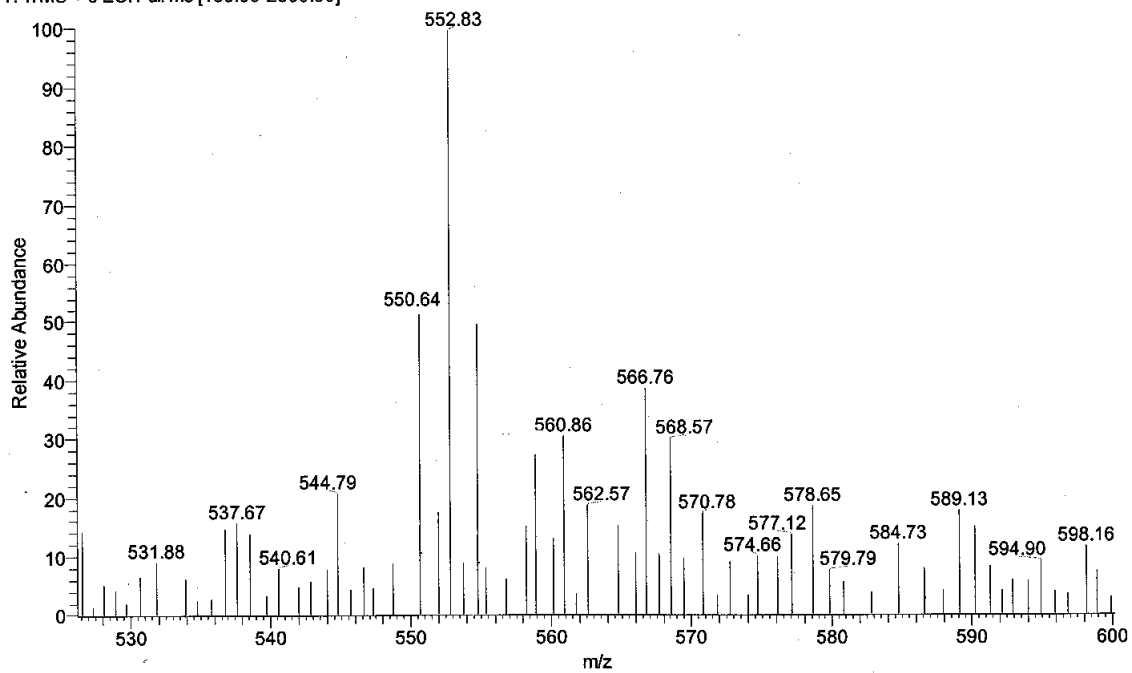

Figure S11 HPLC trace Ammonificin A (1)

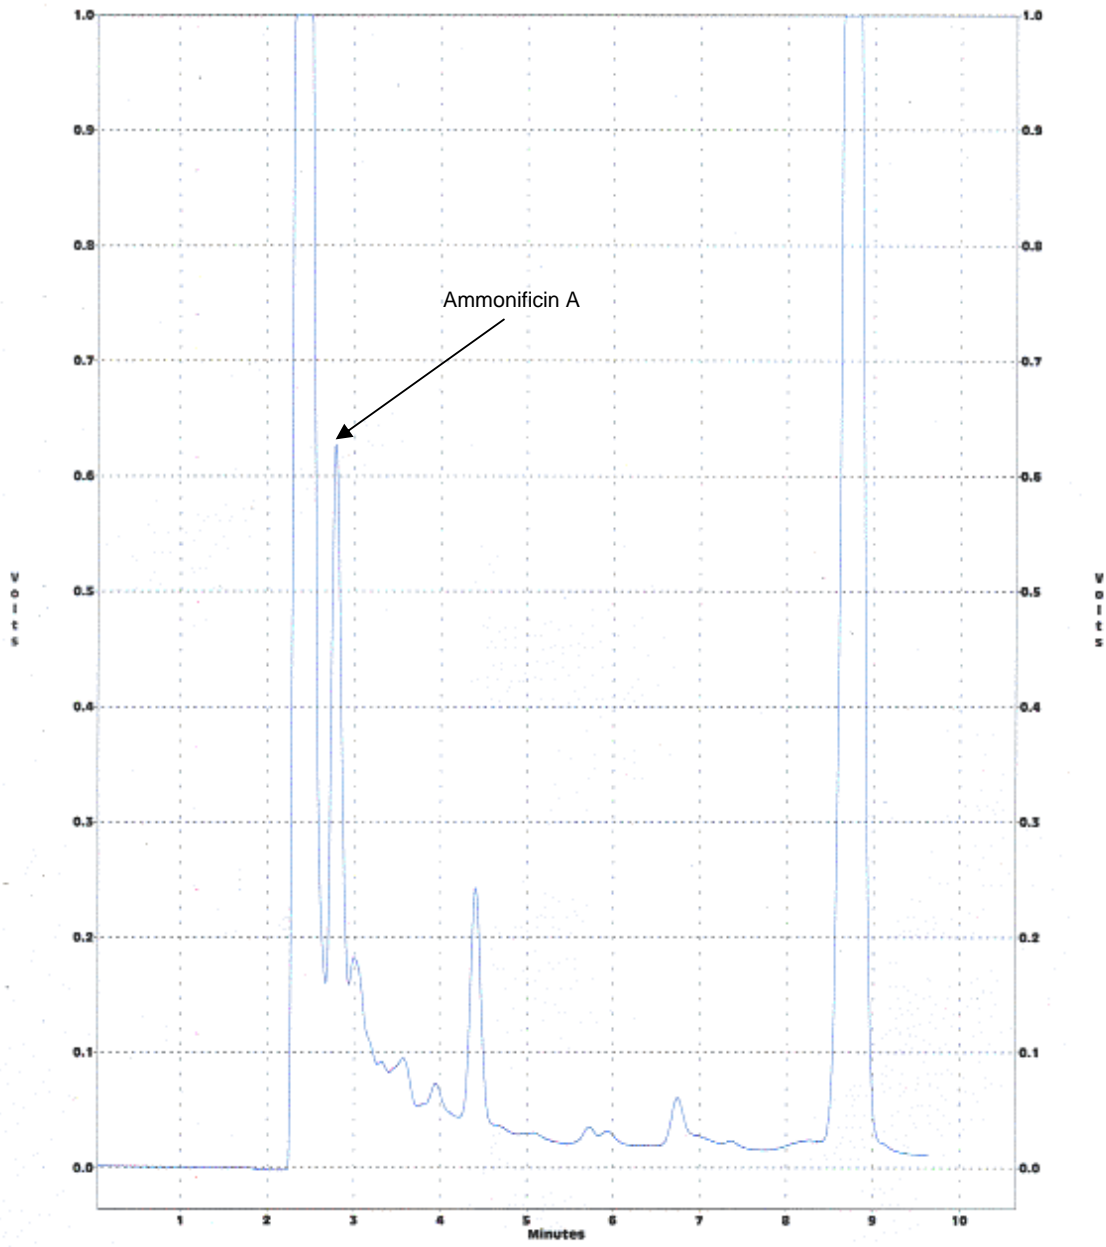

Figure S12 HPLC trace Ammonificin B (2)

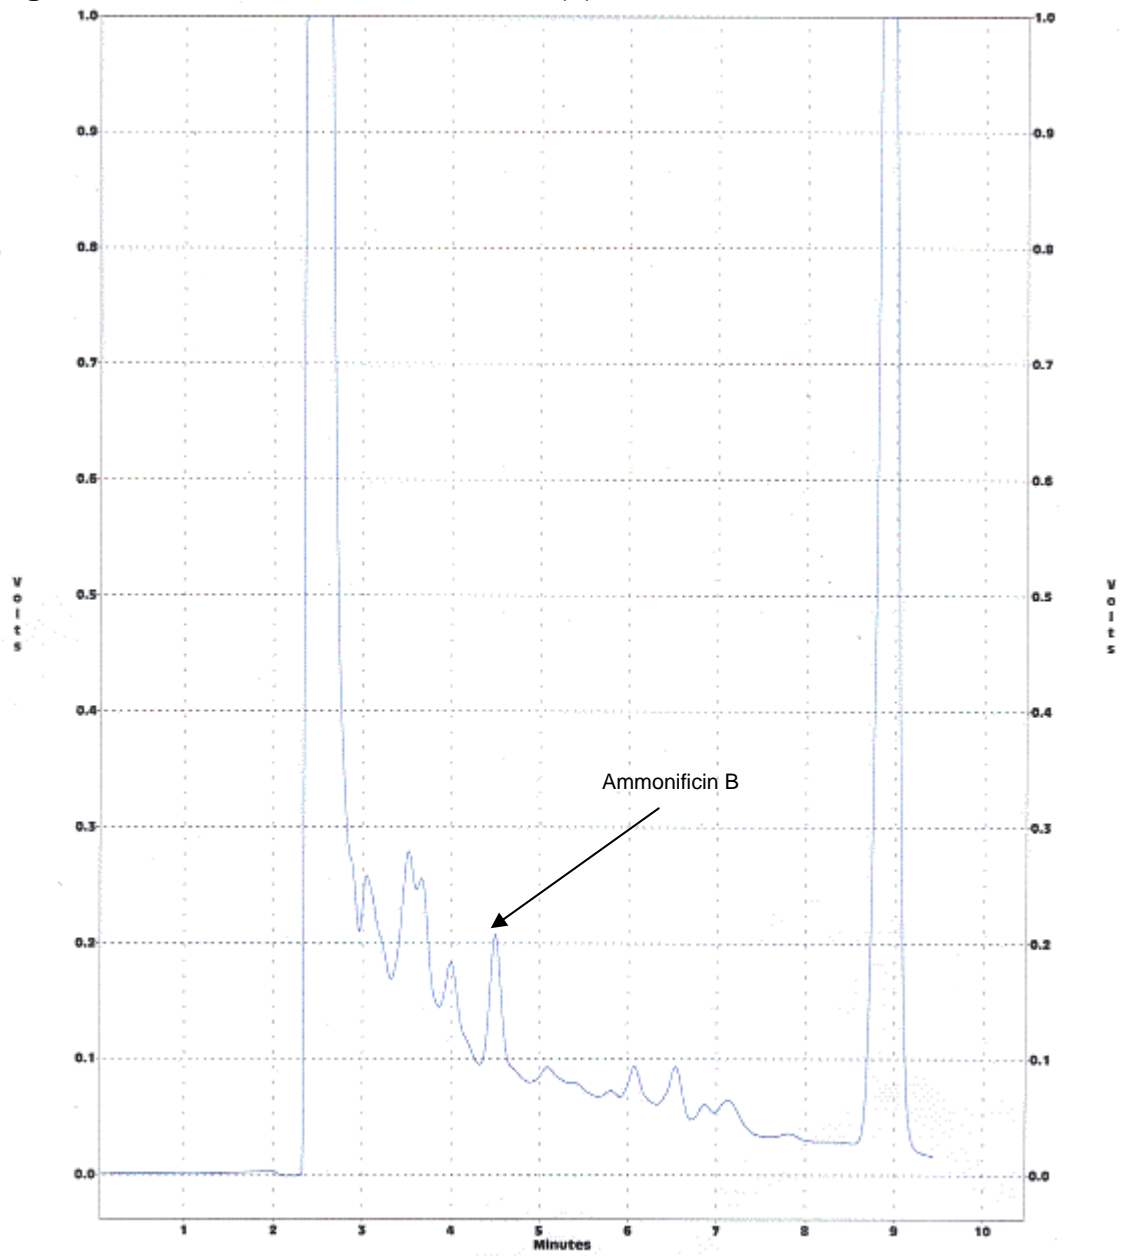

**Figure S13** Experimental and calculated CD spectra of Ammonificin A (1)

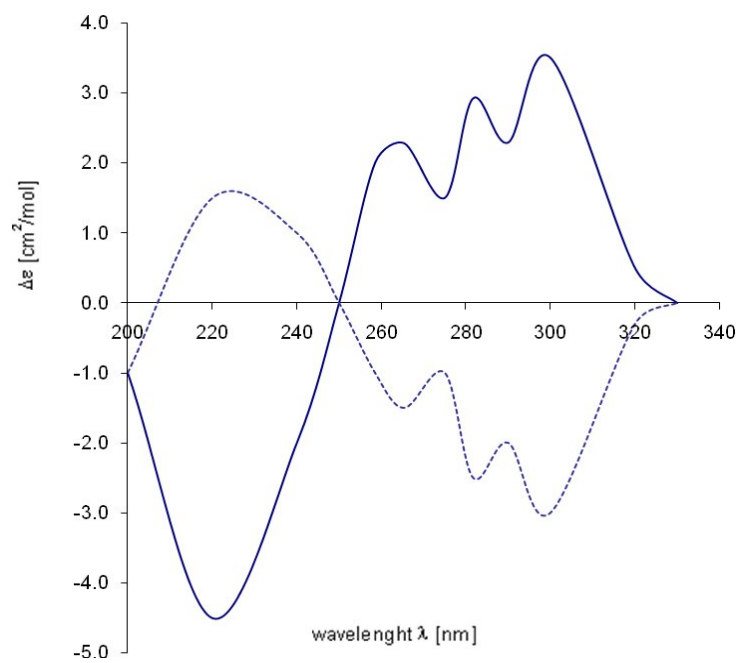

*3R, 4R, 9S*

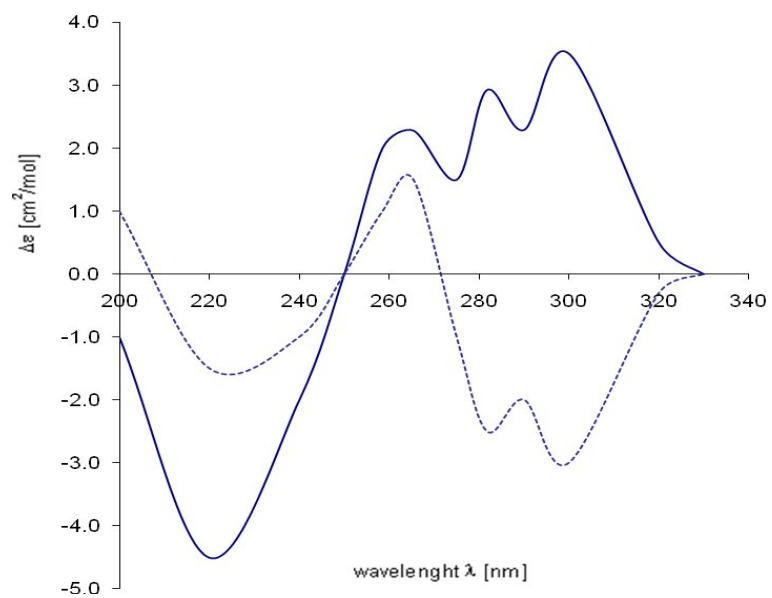

*3S, 4R, 9S*

**Figure S14** Experimental and calculated CD spectra of Ammonificin A (**1**) 3*R*, 4*S*, 9*R* and Ammonificin A (**2**) 3*R*, 4*R*, 9*S*

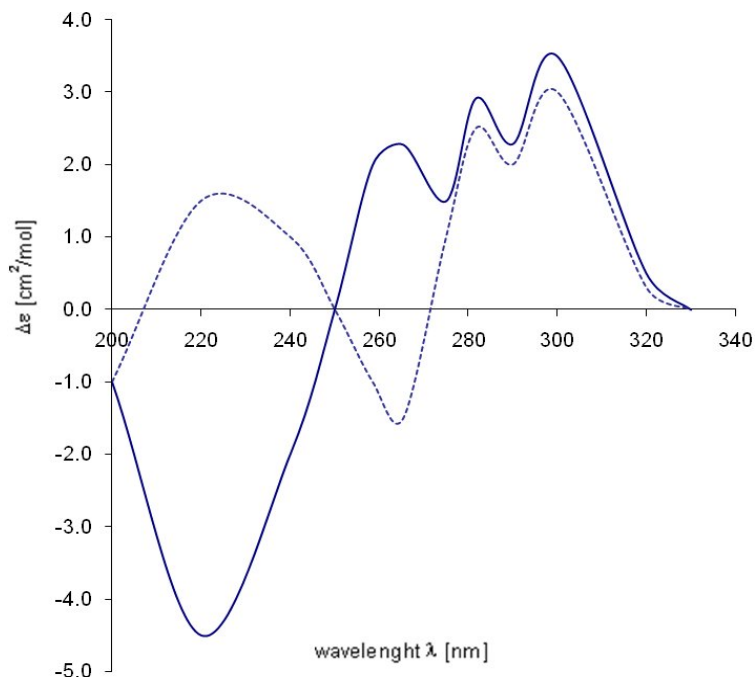

3*R*, 4*S*, 9*R* for (**1**)

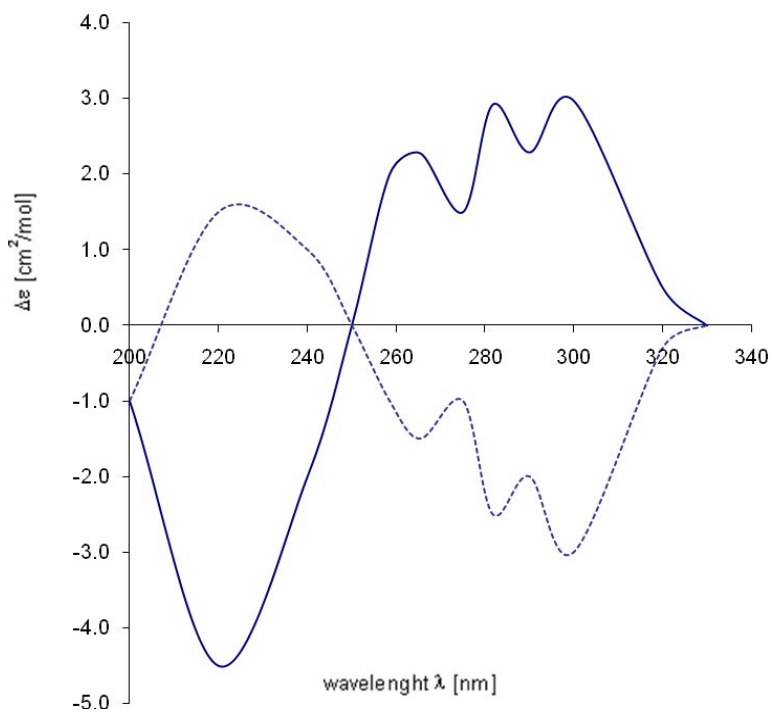

3*R*, 4*R*, 9*S* for (**2**)



**Figure S15** Phylogenetic position of *T. ammonificans* (strain HB-1<sup>T</sup>).

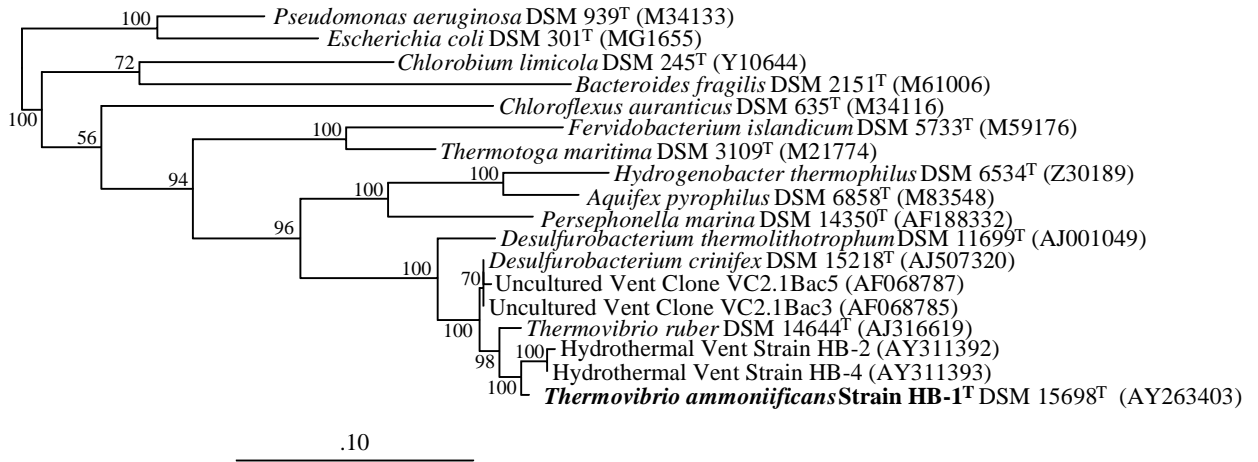

Supplement: NIHMS193377-supplement-supp_info.pdf [file NIHMS193377-supplement-supp_info.pdf]
